# Supplementary material for: Effects of dissolution alkalinity and self-assembly on ZSM-5-based micro-/mesoporous composites: a study of the relationship between porosity, acidity, and catalytic performance
Source: Royal Society of Chemistry journal article supplement (doi:10.1039/c5ce00384a), 2015-01-01
Supplement: c5ce00384a1.pdf [file c5ce00384a1.pdf]

## Supplementary Information

### **Effects of the dissolution alkalinity and self-assembly on ZSM-5-based micro-/mesoporous composites: a study for relationship between porosity, acidity, and catalytic performance**

**Peng Peng,<sup>a</sup> Youhe Wang,<sup>a,b</sup> Mark J Rood,<sup>a,c</sup> Zhanquan Zhang,<sup>a</sup> Fazle Subhan,<sup>a,d</sup> Zifeng Yan,<sup>\*a</sup> Lihong Qin,<sup>e</sup> Zhihua Zhang,<sup>e</sup> Zhongdong Zhang,<sup>e</sup> and Xionghou Gao<sup>e</sup>**

<sup>a</sup> *State Key Laboratory of Heavy Oil Processing, China University of Petroleum, Qingdao 266580, China. Tel: (+) 86 532 86981296; E-mail: [zfyancat@upc.edu.cn](mailto:zfyancat@upc.edu.cn)*

<sup>b</sup> *School of Science, China University of Petroleum, Qingdao 266580, China*

<sup>c</sup> *Department of Civil and Environmental Engineering, University of Illinois at Urbana-Champaign, 205 N. Mathews Avenue, IL 61801, USA*

<sup>d</sup> *Department of Chemistry, Abdul Wali Khan University Mardan, K.P.K, Pakistan*

<sup>e</sup> *Petrochemical Research Institute, China National Petroleum Company, Beijing 100195, China*

## **Synthesis method for conventional Al-MCM-41**

Conventional Al-MCM-41 was synthesized by a hydrothermal method. Sodium metasilicate nonahydrate ( $\text{Na}_2\text{SiO}_3 \cdot 9\text{H}_2\text{O}$ , Sinopharm Chemical Reagent Co. Ltd), and sodium aluminate ( $\text{NaAlO}_2$ , Sinopharm Chemical Reagent Co. Ltd), and served as silicon and aluminum source, respectively.

In a typical experiment, 22.8 g  $\text{Na}_2\text{SiO}_3 \cdot 9\text{H}_2\text{O}$ , 0.23 g  $\text{NaAlO}_2$  together with 150 mL 1.0 mol/L NaOH aqueous solution were mixed and stirred at 353 K for 1 hour. The pH was then adjusted to 10.5 by titration with 2.0 mol/L  $\text{H}_2\text{SO}_4$ . The slurry was then transferred to a Teflon-lined stainless steel autoclave and treated at 110 °C for 24 h for self-assembly of the samples. Finally, the slurry was filtered and washed with deionized water, dried in an oven at 383 K, and subsequently calcined at 823 K for 6 h.

Al-MCM-41 was ion-exchanged with 0.5 mol/L ammonium chloride at 353K for 1h and such treatment was repeated three times. The samples were then calcined at 823 K for 4 h.

## **Synthesis method for Al-MCM-41-like mesostructures**

Al-MCM-41-like mesostructures were synthesized by a hydrothermal method. The parent zeolite was commercial H form ZSM-5 with  $\text{SiO}_2/\text{Al}_2\text{O}_3$  mass ratio = 28 (Nankai Catalyst Company). Typically,  $(5.000 \pm 0.005)$  g ZSM-5 was first mixed with a series of aqueous solutions containing select concentrations of NaOH ( $C_{\text{NaOH}} = 0.4, 0.6, \text{ and } 1.0 \text{ mol/L}$ ). Vigorous agitation of the solution occurred at 353 K for 1 h and then the liquid in the slurry was filtered.  $(4.500 \pm 0.005)$  g CTAB that was dissolved in 60 mL of deionized  $\text{H}_2\text{O}$  and then added to the dissolution system. The pH was then adjusted to 10.5 by addition of 2.0 mol/L sulphuric acid solution. The slurry was then transferred into a Teflon-lined stainless steel autoclave for self-assembly at 383 K for 24 h. The solid product was filtered and washed with excess deionized water, dried in an oven at 383 K, and subsequently calcined at 823 K for 6 h.

Al-MCM-41-like mesostructures were ion-exchanged with 0.5 mol/L ammonium chloride at 353K for 1h and such treatment was repeated three times. The samples were then calcined at 823 K for 4 h.

## **Synthesis method for desilicated ZSM-5**

Desilicated ZSM-5 was synthesized by alkali dissolution. In a typical experiment,  $(5.000 \pm 0.005)$  g commercial ZSM-5 ( $\text{SiO}_2/\text{Al}_2\text{O}_3 = 28$ ), and 150 mL 1.0 mol/L NaOH aqueous solution was mixed and stirred at 353 K for 1 hour. The solid in the slurry was filtered and washed with deionized water, and subsequently dried in an oven at 383 K. This sample was denoted as AT-0.4.

Al-MCM-41 was ion-exchanged with 0.5 mol/L ammonium chloride at 353K for 1h and such treatment was repeated three times. The samples were then calcined at 823 K for 4 h.

## **Tests of silica-alumina ratio in the Al-MCM-41-like mesostructures**

In order to detect the silica-to-alumina ratio ( $\text{SiO}_2/\text{Al}_2\text{O}_3$ ) in the Al-MCM-41-like mesostructures, Al-MCM-41-like mesostructures and conventional Al-MCM-41 mesoporous material were characterized by an X-ray fluorescence (XRF) analyzer. (PAN analytical Axios-Petro)

## Figures Captions:

**Figure S1** Nitrogen adsorption-desorption isotherm (a) and pore width distribution calculated from the BJH desorption branch (b) of Al-MCM-41

**Figure S2** SEM (A) and TEM (B) images of Al-MCM-41

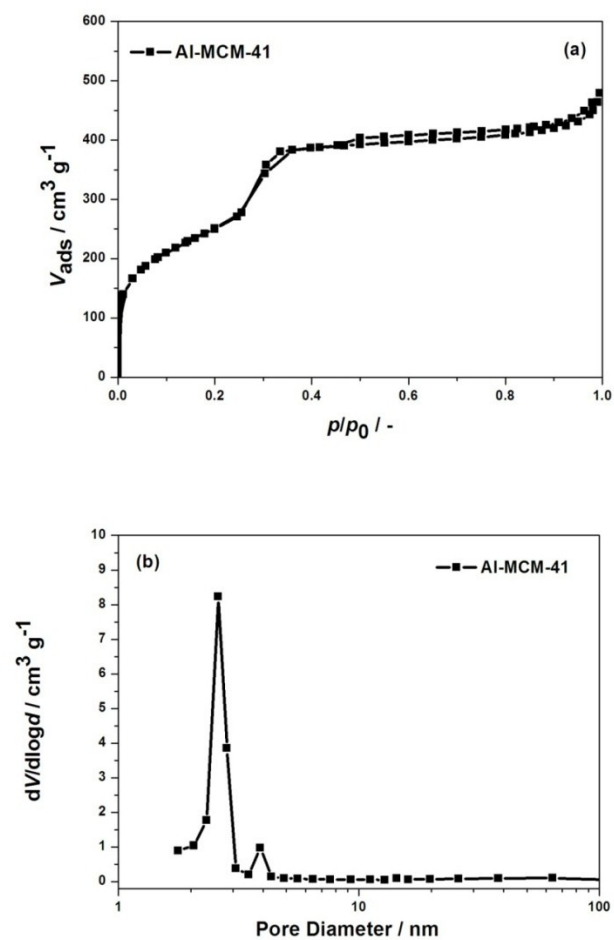

**Figure S1** Nitrogen adsorption-desorption isotherm (a) and pore width distribution calculated from the BJH desorption branch (b) of Al-MCM-41

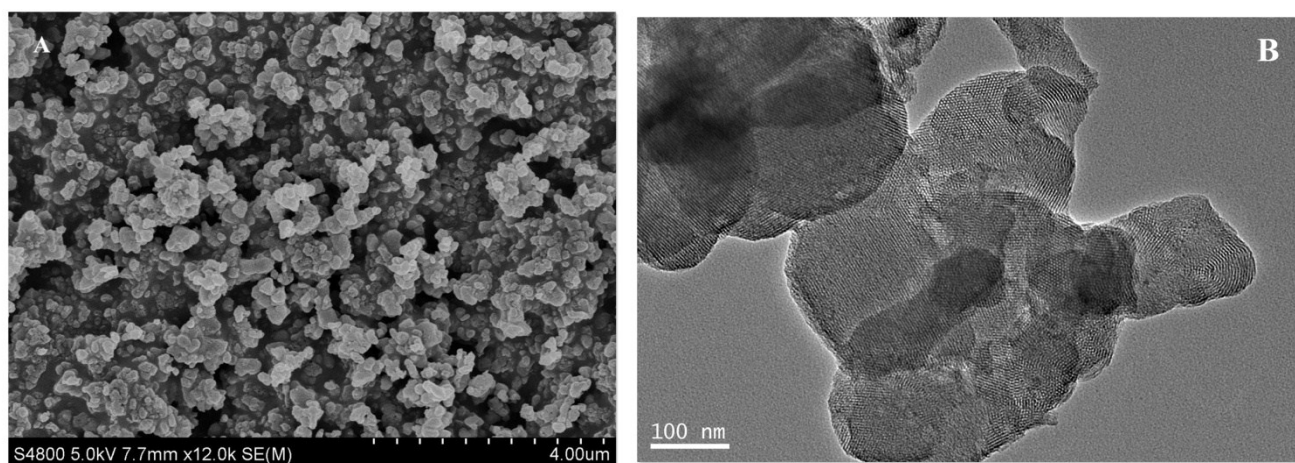

**Figure S2** SEM (A) and TEM (B) images of Al-MCM-41

## Table Captions:

**Table S** Elemental analysis of parent ZSM-5 and MCM-41 samples synthesized from the filtrate after alkali dissolution

**Table S** Elemental analysis of parent ZSM-5 and MCM-41 samples synthesized from the filtrate after alkali dissolution

| <b>Sample</b>  | <b><math>n(\text{SiO}_2):n(\text{Al}_2\text{O}_3)</math><br/>/ -</b> |
|----------------|----------------------------------------------------------------------|
| <b>ZSM-5</b>   | <b>28</b>                                                            |
| <b>MMZ-0.4</b> | <b>133</b>                                                           |
| <b>MMZ-0.6</b> | <b>122</b>                                                           |
| <b>MMZ-1.0</b> | <b>71</b>                                                            |
